# Supplementary material for: The global distribution and spread of the mobilized colistin resistance gene mcr-1
Source: PubMed Central journal article supplement (PMC5862964; doi:10.1038/s41467-018-03205-z), 2018-03-21
Supplement: 41467_2018_3205_MOESM3_ESM.pdf [file 41467_2018_3205_MOESM3_ESM.pdf]

## **Description of Additional Supplementary File**

File Name: Supplementary Data 1

Description: Accession numbers and metadata for the 457 *mcr-1*-positive isolates used in the study
